## Abundance drives broad patterns of generalisation in plant-hummingbird pollination networks

Benno I. Simmons<sup>1\*</sup>, Jeferson Vizontin-Bugoni<sup>2</sup>, Pietro K. Maruyama<sup>3,4</sup>, Peter A. Cotton<sup>5</sup>, Oscar H. Marín-Gómez<sup>6</sup>, Carlos Lara<sup>7</sup>, Liliana Rosero-Lasprilla<sup>8</sup>, María A. Maglianesi<sup>9,10</sup>, Raul Ortiz-Pulido<sup>11</sup>, Márcia A. Rocca<sup>12</sup>, Licléia C. Rodrigues<sup>13</sup>, Boris Tinoco<sup>14</sup>, Marcelo F. Vasconcelos<sup>15</sup>, Marlies Sazima<sup>4</sup>, Ana M. Martín González<sup>16</sup>, Jesper Sonne<sup>16</sup>, Carsten Rahbek<sup>16</sup>, Lynn V. Dicks<sup>17</sup>, Bo Dalsgaard<sup>16</sup>, William J. Sutherland<sup>1</sup>

<sup>1</sup> Conservation Science Group, Department of Zoology, University of Cambridge, The David Attenborough Building, Pembroke Street, Cambridge CB2 3QZ, UK

<sup>2</sup> Department of Natural Resources and Environmental Sciences, University of Illinois at Urbana-Champaign, Turner Hall, 1102 S Goodwin Ave, Urbana, Illinois, USA.

<sup>3</sup> Departamento de Biologia Vegetal, Instituto de Biologia, Universidade Estadual de Campinas (Unicamp), Cx. Postal 6109, CEP:13083-970 Campinas, SP, Brasil

<sup>4</sup> Instituto de Biologia, Universidade Federal de Uberlândia, Uberlândia, MG, Brasil

<sup>5</sup> Marine Biology & Ecology Research Centre, University of Plymouth, Plymouth PL4 8AA, UK

<sup>6</sup> Instituto de Ciencias Naturales, Universidad Nacional de Colombia, Apartado 7495 Bogotá, Colombia; and Red de Ambiente y Sustentabilidad, Instituto de Ecología, A.C., Carretera Antigua a Coatepec 351, El Haya, Xalapa, Veracruz, 91070 México

<sup>7</sup> Centro de Investigación en Ciencias Biológicas Universidad Autónoma de Tlaxcala Km 10.5 Autopista Tlaxcala-San Martín Texmelucan San Felipe Ixtacuixtla, Tlaxcala 90120, Mexico

<sup>8</sup> Escuela de Ciencias Biológicas, Grupo de Investigación Biología para la Conservación, Universidad Pedagógica y Tecnológica de Colombia, Tunja, Boyacá, Colombia

<sup>9</sup> Vicerrectoría de Investigación, Universidad Estatal a Distancia (UNED), San José, Costa Rica

<sup>10</sup> Senckenberg Biodiversity and Climate Research Centre (BiK-F), Senckenberganlage 25, 60325 Frankfurt (Main), Germany

<sup>11</sup> Centro de Investigaciones Biológicas, Instituto de Ciencias Básicas e Ingeniería, Universidad Autónoma del Estado de Hidalgo, Km 4.5, Carretera Pachuca-Tulancingo, Mineral de la Reforma, C.P. 42184 Pachuca, Hidalgo, Mexico

<sup>12</sup> Centro de Ciências Biológicas e da Saúde, Departamento de Ecologia, Universidade Federal de Sergipe, Avenida Marechal Rondon, s/n, Jardim Rosa Elze, CEP: 49100-000 - São Cristóvão, SE, Brasil

<sup>13</sup> Laboratório de Ornitologia, Departamento de Zoologia, ICB, Universidade Federal de Minas Gerais. Caixa Postal 486, CEP: 31270-901, Belo Horizonte, MG, Brasil

<sup>14</sup> Escuela de Biología, Ecología y Gestión, Universidad del Azuay, Cuenca, Ecuador

<sup>15</sup> Museu de Ciências Naturais, Pontifícia Universidade Católica de Minas Gerais, Coração Eucarístico, CEP: 30535901 - Belo Horizonte, MG – Brasil

<sup>16</sup> Center for Macroecology, Evolution and Climate, Natural History Museum of Denmark, University of Copenhagen, Universitetsparken 15, 2100 Copenhagen Ø, Denmark

<sup>17</sup> School of Biological Sciences, University of East Anglia, Norwich NR4 7TL, UK

\* Corresponding author: [benno.simmons@gmail.com](mailto:benno.simmons@gmail.com)

44 **Abstract**

45

46 Abundant pollinators are often more generalised than rare pollinators. This could be because  
47 abundance drives generalisation: neutral effects suggest that more abundant species will be  
48 more generalised simply because they have more chance encounters with potential interaction  
49 partners. On the other hand, generalisation could drive abundance, as generalised species could  
50 have a competitive advantage over specialists, being able to exploit a wider range of resources  
51 and gain a more balanced nutrient intake. Determining the direction of the abundance-  
52 generalisation relationship is therefore a ‘chicken-and-egg’ dilemma. Here we determine the  
53 direction of the relationship between abundance and generalisation in plant-hummingbird  
54 pollination networks sampled from a variety of locations across the Americas. For the first time  
55 we resolve the direction of the abundance-generalisation relationship using independent data  
56 on animal abundance. We find evidence that hummingbird pollinators are generalised because  
57 they are abundant, and little evidence that hummingbirds are abundant because they are  
58 generalised. Additionally, a null model analysis suggests this pattern is due to neutral  
59 processes: most patterns of species-level abundance and generalisation were well explained by  
60 a null model that assumed interaction neutrality. These results suggest that neutral processes  
61 play a key role in driving broad patterns of generalisation in animal pollinators across large  
62 spatial scales.

63

64 **Keywords:** generalisation, hummingbirds, mutualism, mutualistic networks, plant-animal  
65 interactions, pollination, specialisation

## 66 **Declarations**

67

68 Funding – BIS is supported by the Natural Environment Research Council as part of the  
69 Cambridge Earth System Science NERC DTP [NE/L002507/1]. JVB was funded by CERL -  
70 Engineer Research and Development Center. PKM was funded by the São Paulo Research  
71 Foundation (FAPESP grant #2015/21457-4). PAC was funded by the David Lack studentship  
72 from the British Ornithologists' Union and Wolfson College, University of Oxford. CL was  
73 funded by the ESDEPED-UAT grant. MAM acknowledges the Consejo Nacional para  
74 Investigaciones Científicas y Tecnológicas (Costa Rica), German Academic Exchange Service  
75 and the research funding program 'LOEWE-Landes-Offensive zur Entwicklung  
76 Wissenschaftlichö konomischer Exzellenz' of Hesse's Ministry of Higher Education,  
77 Research, and the Arts (Germany). ROP was funded by CONACyT (project 258364). MAR  
78 was supported by the State of São Paulo Research Foundation (FAPESP) within the  
79 BIOTA/FAPESP, The Biodiversity Institute Program ([www.biota.org.br](http://www.biota.org.br)) and the 'Parcelas  
80 Permanentes' project, as well as by Coordenação de Pessoal de Nível Superior (CAPES),  
81 Fundo de Apoio ao Ensino e à Pesquisa (FAEP)/Funcamp/Unicamp and The Nature  
82 Conservancy (TNC) of Brazil. LCR was supported by CNPq and Capes. MS was funded by  
83 CNPq (grant #302781/2016-1). AMMG is supported through a Marie Skłodowska-Curie  
84 Individual Fellowship (H2020-MSCA-IF-2016-704409). LVD was supported by the Natural  
85 Environment Research Council (grants NE/K015419/1 and NE/N014472/1). AMMG, JS, CR  
86 and BD thank the Danish National Research Foundation for its support of the Center for  
87 Macroecology, Evolution and Climate (grant no. DNRF96). WJS is funded by Arcadia.

## 88 Introduction

89

90 Pollination and other mutualistic associations are crucial for the functioning and maintenance  
91 of ecological communities (Heithaus 1974, Rech et al. 2016, Ollerton 2017, Ratto et al. 2018).  
92 A common phenomenon in mutualistic communities is that more abundant species tend to have  
93 more generalised interaction niches, interacting with a greater number of partners than rare  
94 species (Dupont et al. 2003, Vázquez and Aizen 2003, Olesen et al. 2008). Thus, abundant  
95 species are often ‘ecological’ generalists (Ollerton et al. 2007). However, the direction of the  
96 relationship between abundance and generalisation has been described as a ‘chicken-and-egg’  
97 dilemma as there are valid *a priori* explanations for both directions (Fort et al. 2016, Dormann  
98 et al. 2017). For example, high abundance could lead to high generalisation simply due to  
99 neutral effects: more abundant species have a higher likelihood of encountering a greater  
100 number of potential interaction partners than rarer species (Vázquez et al. 2007, 2009, Poisot  
101 et al. 2015). Additionally, pollinators have been observed to increase their generalisation when  
102 at high densities: in a given area, higher species abundance leads to greater conspecific  
103 competition for the available resources, resulting in increased generalization as predicted by  
104 optimal foraging theory (Fontaine et al. 2008, Tinoco et al. 2017). Conversely, high  
105 generalisation could lead to high abundance. For example, the wider diet breadth of generalist  
106 individuals could be advantageous in communities with high levels of variability or species  
107 turnover where flexibility is beneficial (Waser et al. 1996, CaraDonna et al. 2017). Such  
108 ‘portfolio effects’ allow a mutualist to receive a more stable benefit over time despite having  
109 partners with asynchronous dynamics or different performance trade-offs (Batstone et al.  
110 2018). Generalisation can also provide a better nutrient balance (Tasei and Aupinel 2008,  
111 Behmer 2009, Vaudo et al. 2015), improve species’ pathogen resistance (Alaux et al. 2010, Di  
112 Pasquale et al. 2013) and afford functional redundancy that buffers against partner extinction  
113 (Biesmeijer et al. 2006). In a recent review by Batstone et al. (2018), the authors argue that  
114 generalisation in mutualisms can have a selective advantage over specialisation for many  
115 reasons. These include sampling effects, where generalisation increases the likelihood that a  
116 given mutualist will sample the most beneficial partner (for example, Albrecht et al. 2012), and  
117 complementarity, where a given mutualist benefits from having diverse partners that occupy  
118 different niches, but provide the same rewards via different mechanisms. Therefore,  
119 generalization may confer advantages to specific pollinators, resulting in higher abundances.

120

121 Here we evaluate the direction of the abundance-generalisation relationship in plant-  
122 hummingbird pollination networks and use a null model to assess the extent to which observed  
123 patterns of species-level generalisation can be explained by neutral effects. We focus on  
124 hummingbird species, rather than plants, as plants may have non-hummingbird mutualistic  
125 partners not included in our data that could result in misleading estimates of generalisation  
126 (Dalsgaard et al. 2008). Plant-hummingbird interactions are a particularly interesting model  
127 system to answer these questions as they involve species spanning the entire specialisation-  
128 generalisation spectrum (Bleiweiss 1998, Martín González et al. 2015, Dalsgaard et al. 2018)  
129 and recent studies suggest that abundance has little influence on network structure compared  
130 to morphological trait matching (Maruyama et al. 2014, Vizentin-Bugoni et al. 2014, 2016,  
131 Weinstein and Graham 2017, though see Bergamo et al. 2017 and Dalsgaard et al. 2018).  
132 Understanding the processes governing specialisation and generalisation can also contribute to  
133 explaining the high diversity of sympatric hummingbird species as niche partitioning can play  
134 a role in species coexistence, thus it may also add to the explanation why there are so many  
135 species in the tropics (Dalsgaard et al. 2011). Additionally, pollination by vertebrates is  
136 important, especially in the tropics (Bawa 1990, Vizentin-Bugoni et al. 2018), and is on average  
137 responsible for 63% of fruit or seed production in vertebrate-pollinated plants (Ratto et al.

138 2018). Therefore, understanding the abundance-generalisation relationship in vertebrate  
139 pollinators such as hummingbirds has important implications for understanding the processes  
140 maintaining tropical plant and vertebrate communities. While previous attempts to resolve the  
141 abundance-generalisation chicken-and-egg dilemma have used species' interaction frequency  
142 as a proxy for animal abundance (Fort et al. 2016), which can lead to biased conclusions  
143 (Vizentin-Bugoni et al. 2014), here we use independent animal abundance estimates. This is  
144 an important advance because all 35 pollination and seed dispersal networks analysed by Fort  
145 et al (2016) used estimates of animal abundance based on the interaction network data, and the  
146 authors had direct measures of plant abundance for only 29% of networks. By their own  
147 admission, "These animal abundance data are arguably limited, as they are not independent  
148 from the interactions; but these are the best data available to evaluate our question."  
149 Conversely, ours is the first study where we have estimates of plant and animal abundance  
150 independent from the interaction observations for the majority of networks. This study also  
151 represents a significant methodological advance for resolving the chicken-and-egg dilemma.  
152 While Fort et al (2016) classified species' abundance and generalisation using either strict  
153 thresholds or parametric fuzzy logic methods which assume linearity, our approach makes no  
154 such assumptions about the distributions of the data and uses the data's full continuous range  
155 without the use of thresholds. We find evidence of a unidirectional relationship with  
156 hummingbird abundance driving hummingbird generalisation. Importantly, a null model  
157 assuming neutrality of interactions closely matched most empirical results. This suggests that  
158 neutral effects have an important role in structuring broad patterns of species-level  
159 generalisation, even in a system such as plant-hummingbird pollination networks where  
160 phenotypical matching has a strong influence on the occurrence of pairwise interactions among  
161 species.

162

## 163 **Material and Methods**

164

### 165 **Dataset**

166

167 We assembled a database of plant-hummingbird pollination networks with complementary  
168 information on hummingbird and plant abundance. In total we gathered 19 quantitative  
169 networks, where link weights represent the number of observed hummingbird visits to plants.  
170 In total, the database contained 103 hummingbird species and 403 plant species. For each of  
171 the 19 networks, hummingbird abundances were quantified as the mean number of individuals  
172 per species either recorded along transect counts within the sampling plots or caught using mist  
173 nets (Appendix 1). For four networks where species were not recorded within the sampling  
174 plots during transect counts or mist netting, we used frequency of occurrence (the proportion  
175 of days of fieldwork in which a given species was recorded) as a proxy for relative abundances,  
176 as both measures are strongly correlated and frequency of occurrence is still independent from  
177 the network data (Vizentin-Bugoni et al. 2014). To test whether these four networks affected  
178 our results, we repeated all analyses excluding these data (Appendix 2). Plant abundances were  
179 quantified along transect counts or inside plots within the study areas and summarized as the  
180 number of flowers per species recorded over the sampling period. Species abundances and  
181 interactions were quantified several times (typically, monthly) over at least a complete annual  
182 cycle in each community. Further details of each network are given in Appendix 1.

183

### 184 **Measures of generalisation**

185

186 We calculated the level of generalisation of all hummingbird species in all networks. To assess  
187 the sensitivity of our results to the choice of generalisation metric, we measured generalisation



188 in three ways. First, species degree, which is simply the number of plant species a given  
189 hummingbird species interacts with. Second, normalised degree, which is equal to a species'  
190 degree divided by the total number of possible partners. Third, a generalisation index  $g$ , based  
191 on a widely used species-level measure of specialization ( $d'$ ) that quantifies the extent to which  
192 a species deviates from a random sampling of its available interaction partners (Blüthgen et al.  
193 2006). We calculated  $d'$  using independent abundance data. To ensure that higher values of  $d'$   
194 corresponded to higher levels of generalisation, we calculated the standardised generalisation  
195 index  $g$ , defined as  $1-d'/d'_{\max}$  where  $d'_{\max}$  is the maximum possible value of  $d'$  (Fort et al. 2016).  
196  $d'$  and  $d'_{\max}$  were calculated using the 'dfun' function in the 'bipartite' R package (Dormann et  
197 al. 2009).

198

## 199 **General approach**

200

201 First, we tested whether there was a relationship between hummingbirds' abundance and their  
202 level of generalisation using three linear mixed effects models, one for each generalisation  
203 metric. The generalisation metric was the response variable, with  $\log(\text{abundance})$  as a fixed  
204 effect and species and network identity as random effects. A Poisson distribution was used for  
205 the model with degree as the response variable, a binomial distribution was used for the model  
206 with normalised degree as the response variable (with weights equal to the maximum degree  
207 of each species) and a Gaussian distribution was used for the model with  $g$  as the response  
208 variable. Mixed effects models were fitted using the 'lme4' R package (Bates et al. 2015) and  
209 the significance of fixed effects was calculated using Wald  $\chi^2$  tests available in the 'Anova'  
210 function of the 'car' R package (Fox and Weisberg 2002). We calculated both the marginal  
211  $R^2_{(G)LMM(m)}$ , which represents the variance explained by fixed effects, and the conditional  
212  $R^2_{(G)LMM(c)}$ , which represents the variance explained by both fixed and random effects  
213 (Nakagawa and Schielzeth 2013, Emer et al. 2016, Kaiser-Bunbury et al. 2017, Bartoń 2018).

214

215 Having established that there is a relationship between abundance and generalisation, we used  
216 the approach of Fort *et al.* (2016) to determine whether abundance drives generalisation or  
217 generalisation drives abundance. This approach uses formal logic, specifically material  
218 implication, to derive expectations for broad species-level patterns of abundance and  
219 generalisation in ecological communities. To explain the approach, it is useful to consider a  
220 simple example. Consider the proposition,  $P$ , "if it is a dodo, it is extinct".  $P$  is made up of two  
221 statements: (i) "it is a dodo" and (ii) "it is extinct". Given that each of these statements can  
222 either be true or false, we can derive four possible outcomes, as shown in Table 1. Outcome A  
223 is a dodo that is extinct. Outcome B is a non-dodo that is not extinct, such as the hummingbird  
224 species *Amazilia versicolor*. Outcome C is a non-dodo that is extinct, such as the dinosaur  
225 species *Tyrannosaurus rex*. Finally, outcome D is a dodo that is not extinct. We can only refute  
226 the proposition "if it is a dodo, it is extinct" when we observe outcome D to be true; that is, if  
227 we observe a living dodo. Conversely, observing an extinct dodo, an extant *Amazilia versicolor*  
228 individual, or an extinct *T. Rex* specimen are all consistent with  $P$ .

229

230 There are four possible outcomes when applying this to the abundance-generalisation chicken-  
231 and-egg dilemma: abundant generalists, rare generalists, abundant specialists and rare  
232 specialists (Table 1). We can therefore derive two hypotheses:

233

- 234 1. If abundance implies generalisation, there should be no species which are abundant and  
235 specialist (outcome D: living dodos); we would only expect to observe abundant  
236 generalists (outcome A: extinct dodos), rare specialists (outcome B: a living *Amazilia*  
237 *versicolor*) and rare generalists (outcome C: extinct *T. Rex*).

238 2. If generalisation implies abundance, there should be no generalist species that are rare;  
239 we would only expect to observe rare specialists, abundant specialists and abundant  
240 generalists.

241  
242 Therefore, by calculating the proportion of hummingbird species in each of the four abundance-  
243 generalisation categories (rare specialists, abundant specialists, rare generalists and abundant  
244 generalists), it is possible to test these two hypotheses and determine whether the relationship  
245 between hummingbird abundance and generalisation is unidirectional (Fort et al. 2016).  
246 Particularly it is important to look at the proportion of rare generalists and abundant specialists:  
247 if hypothesis 1 is correct, there should be few abundant specialists; if hypothesis 2 is correct,  
248 there should be few rare generalists.

249

## 250 **Abundance and generalisation classification**

251

252 To calculate the proportion of hummingbird species in each abundance-generalisation  
253 category, we developed a novel methodology to classify each species in a community as either  
254 rare or abundant and as either specialist or generalist. As mentioned above, this improves on  
255 Fort et al's (2016) methodology by making no assumptions about the distributions of the data  
256 and by using the data's full continuous range without the use of thresholds. For each network,  
257 we first rescaled the abundance and generalisation values of all hummingbird species to range  
258 between 0 and 1 according to  $(x - x_{\min}) / (x_{\max} - x_{\min})$ , where  $x_{\min}$  and  $x_{\max}$  are the minimum and  
259 maximum values of abundance or generalisation (Aizen et al. 2012). These values represent  
260 the probability with which a species would be classified as abundant or generalist. Next, we  
261 sampled a random value from a uniform distribution between 0 and 1. If a species' rescaled  
262 abundance or generalisation was greater than or equal to this value, it was classified as  
263 abundant or generalist, respectively. If it was less than this value, it was classified as rare or  
264 specialist, respectively. Therefore, a species with a rescaled abundance of 0.2 would have a  
265 20% probability of being classified as abundant in a given iteration. Similarly, a species with  
266 a rescaled abundance of 0.8 would have an 80% probability of being classified as abundant.  
267 This was repeated 1000 times. The mean proportion of species in each of the four abundance-  
268 generalisation categories was then calculated. This was repeated for each of the three  
269 generalisation metrics.

270

## 271 **Null model analysis**

272

273 To assess the extent to which our results could be explained purely by neutral effects, we used  
274 a null model to generate 1000 randomised versions of each empirical network. The null model  
275 assumed interaction neutrality by assigning interactions according to a probability matrix,  $\mathbf{A}$ ,  
276 where element  $a_{ij}$  was the relative abundance of hummingbird species  $i$  multiplied by the  
277 relative abundance of plant species  $j$  (Vázquez et al. 2007, Maruyama et al. 2014, Vizentin-  
278 Bugoni et al. 2014, 2016). Therefore, the model assumes that two species with high abundance  
279 have a greater likelihood of interacting than two species with low abundance. The model  
280 constrained the number of links and ensured that each species had at least one interaction  
281 (Vázquez et al. 2007). We used independent plant and hummingbird abundance data to create  
282 the null networks, rather than relying on species marginal totals as a proxy for abundance. For  
283 each of the 1000 null versions of each of the 19 empirical networks, we repeated the  
284 permutational analysis described above ('Abundance and generalisation classification') to  
285 calculate the mean proportion of species in each of the four abundance-generalisation  
286 categories predicted by the neutral model. We then compared these proportions based on  
287 neutrality to the empirical proportions: if the empirical proportions were within the 95%

288 confidence intervals of the null model proportions then there were no significant differences  
289 between the null model and the observed values.

290

## 291 **Results**

292

293 We confirmed the positive relationship between abundance and generalisation in our dataset,  
294 finding a significant correlation between abundance and generalisation for degree (Wald test:  
295  $\chi^2 = 216.44$ ;  $df = 1$ ;  $P = < 0.001$ ;  $R^2_{\text{GLMM}(m)} = 0.55$ ;  $R^2_{\text{GLMM}(c)} = 0.79$ ), normalised degree (Wald  
296 test:  $\chi^2 = 232.1$ ;  $df = 1$ ;  $P = < 0.001$ ;  $R^2_{\text{GLMM}(m)} = 0.26$ ;  $R^2_{\text{GLMM}(c)} = 0.37$ ) and the generalisation  
297 index  $g$  (Wald test:  $\chi^2 = 10.7$ ;  $df = 1$ ;  $P = 0.001$ ;  $R^2_{\text{LMM}(m)} = 0.06$ ;  $R^2_{\text{LMM}(c)} = 0.44$ ).

298

299 Only a small proportion of species were abundant and specialist for all three generalisation  
300 metrics (Figure 1). Conversely, the proportion of species that were rare and generalist was  
301 consistently larger, particularly for the  $g$  generalisation metric. These differences were  
302 significant: the proportion of species that were rare and generalist was significantly higher than  
303 the proportion which were abundant and specialist for degree ( $t = 2.92$ ,  $df = 18$ ,  $p = 0.009$ ),  
304 normalised degree ( $t = 2.91$ ,  $df = 18$ ,  $p = 0.009$ ) and  $g$  ( $t = 10.34$ ,  $df = 18$ ,  $p = < 0.001$ ) (Figure  
305 1). Overall, these findings support hypothesis 1, that abundance drives generalisation, and do  
306 not support hypothesis 2, that generalisation drives abundance.

307

308 The proportion of species in each of the four abundance-generalisation categories predicted by  
309 the neutrality null model closely matched the empirical proportions, particularly for degree and  
310 normalised degree where there were no significant differences between observed and predicted  
311 proportions for the majority of networks (68–84% of networks; Figure 2). For  $g$ , the model  
312 correctly predicted the proportion of rare specialists and generalists for 79% of networks, but  
313 performed less well in predicting the proportion of abundant specialists and generalists, with  
314 predictions matching observed values for only 47% of networks (Figure 2).

315

316 All results were qualitatively the same and conclusions identical after the exclusion of the four  
317 networks where we used frequency of occurrence (the proportion of days of fieldwork in which  
318 a given species was recorded) as a proxy for relative abundances (Appendix 2).

319

## 320 **Discussion**

321

322 Our analysis of numerous plant-hummingbird communities sampled widely across the  
323 Americas support the hypothesis that abundance drives species-level generalisation, and  
324 provide little evidence that generalisation drives species abundance. These results can be  
325 discussed in the context of *sufficient* and *necessary* conditions from formal logic. If we say that  
326  $P$  is a *necessary* condition for  $Q$ , then in the absence of  $P$  there is also an absence of  $Q$ . For  
327 example, sitting the exam is a *necessary* condition for getting an A grade. If a student does not  
328 sit the exam, they will not get an A grade. Similarly, if a student is awarded an A grade, they  
329 must have sat the exam. However, if  $P$  is a *sufficient* condition for  $Q$ , then if we have  $P$ ,  $Q$  must  
330 follow. For example, obtaining full marks on every exam question is a *sufficient* condition for  
331 getting an A grade in the exam. Therefore, if a student gets full marks on every question, they  
332 will get an A grade. However, getting full marks on every question is not a *necessary* condition  
333 for getting an A grade: it is possible to get an A without achieving full marks on all questions.  
334 Similarly, sitting the exam is not a *sufficient* condition for getting an A grade: it is possible to  
335 sit the exam and not get an A. Our results suggest abundance is a *sufficient* condition for  
336 generalisation as, if a species is abundant, it tends to also be a generalist. However, it is not a  
337 *necessary* condition as species can be generalist without being abundant. Conversely, our



338 results suggest generalisation is a *necessary* condition for abundance as, if a species is a  
339 specialist, it tends to be rare. However, it is not a *sufficient* condition for abundance as, if a  
340 species is a generalist, this does not mean it is abundant. Therefore, our results agree with those  
341 of Fort *et al.* (2016) using pollination and seed dispersal networks, suggesting that abundance  
342 driving generalisation may be a general phenomenon that can be observed in mutualistic  
343 systems.

344

345 In all ecological studies it is worth asking whether sampling effort may impact the results. This  
346 is also the case for studies of species interaction networks, as sampling effects can influence  
347 the observed network structure (Fründ *et al.* 2016, Jordano 2016, Vizentin-Bugoni *et al.* 2016,  
348 Dalsgaard *et al.* 2017). Sampling is likely to result in missed detections of interactions for rare  
349 species, resulting in an underestimation of how generalised rare species are (Blüthgen 2010,  
350 Dorado *et al.* 2011). For this reason, Dormann *et al.* (2017) described sampling rare species  
351 with high generalisation as “impossible”. This means that our results are unlikely to be a  
352 function of sampling effects, as the proportion of rare generalist species we observe is likely  
353 less than the true proportion: under theoretical perfect sampling, we would likely observe a  
354 larger proportion of species which are rare generalists, reinforcing our results (Dorado *et al.*  
355 2011). Furthermore, sampling effects are likely to overestimate the proportion of species that  
356 are rare specialists as, even when rare species are observed, they are unlikely to be observed  
357 on all the plants they visit. This suggests that sampling effects will cause the generalisation  
358 level of rare species to be underestimated, and that consequently some species classified as rare  
359 specialists may actually be rare generalists (Blüthgen 2010, Dorado *et al.* 2011). Sampling  
360 effects are therefore not likely to impact our conclusions, because with perfect sampling we  
361 would expect the proportion of rare generalists to increase and the proportion of rare specialists  
362 to decrease, further increasing support for hypothesis 1 (many rare generalists, few abundant  
363 specialists) and refuting hypothesis 2 (few rare generalists, many abundant specialists).  
364 Additionally, we would not expect sampling artefacts to explain the low proportion of species  
365 which were abundant specialists because sampling effects tend to come from missing links for  
366 rare species rather than abundant species (Blüthgen 2010, Dorado *et al.* 2011, Fort *et al.* 2016).

367

368 A frequent interpretation of the abundance-generalisation relationship is that abundant species  
369 are more generalised due to neutral effects; that is, they are more likely to encounter a greater  
370 number of interaction partners than less abundant species by chance alone (Vázquez *et al.*  
371 2007). Our null model analysis supports this interpretation, particularly for degree and  
372 normalised degree: we found that the numbers of rare specialists, abundant specialists, rare  
373 generalists and abundant generalists were well predicted for the majority of networks by a null  
374 model that assumed interactions were formed entirely from neutral processes. This finding  
375 complements other recent studies of plant-hummingbird pollination networks showing the  
376 importance of morphological trait matching in predicting pairwise interactions at the network  
377 level (Maruyama *et al.* 2014, Vizentin-Bugoni *et al.* 2014, 2016, Weinstein and Graham 2017),  
378 while here we show that abundance predicts broad patterns of generalisation at the species  
379 level. Among Antillean hummingbirds, it was recently shown that local environmental  
380 conditions and floral richness, not hummingbirds’ morphological traits, determined species  
381 level nectar-feeding specialization (Dalsgaard *et al.* 2018). Combined with our findings, this  
382 might suggest a hierarchy of mechanisms structuring plant-hummingbird interactions, and  
383 more broadly whole pollination networks (Junker *et al.* 2013, Bartomeus *et al.* 2016, Vizentin-  
384 Bugoni *et al.* 2018): neutrality and local conditions govern broad patterns of generalisation,  
385 such as the number of plant partners, while morphological matching operates at a lower level  
386 to determine the identity of these plant partners. For the generalisation index  $g$ , the null model  
387 performed less well, predicting the proportion of abundant specialists and abundant generalists

388 correctly in only 47% of networks. For the remaining 53% of networks, the model generally  
389 over predicted the number of abundant generalists and under predicted the number of abundant  
390 specialists. This may be due the nature of the  $g$  index itself: by accounting for the abundance  
391 of plants,  $g$  does not necessarily correlate with species degree (number of plant partners). For  
392 example, a hummingbird which visits one abundant plant could receive a higher value of  $g$  than  
393 a hummingbird that visits three rare plants. This means the null model may overestimate the  
394 number of abundant generalists and underestimate the number of abundant specialists as, in the  
395 model, an abundant hummingbird will have a higher probability of interacting with all plants,  
396 while in the empirical network it may be able to gain sufficient resources by only interacting  
397 with the most abundant plants.

398  
399 Taken together, our study confirms that abundance is a sufficient, but not necessary, condition  
400 for generalisation in plant-hummingbird pollination networks; it is the first study to test this  
401 hypothesis in animals using independent data on species abundance encompassing a wide array  
402 of communities. Remarkably, our result corroborates the findings of Fort et al. (2016), giving  
403 further support that this may be a general phenomenon in mutualistic systems. Further research  
404 should investigate whether the relationships found here hold for other types of ecological  
405 systems. We also find evidence that neutral effects are good predictors of coarse species-level  
406 patterns of generalisation, even in a system in which interactions are widely recognized to be  
407 constrained by species traits. This might suggest a hierarchy of mechanisms structuring plant-  
408 hummingbird interactions, with neutral effects operating at a ‘high level’ to determine coarse  
409 patterns of generalisation, such as the number of partners, while niche-based processes act at a  
410 lower level to determine the identity of these partners.

411

## 412 **Data accessibility**

413

414 Data will be deposited in Data Dryad before we submit a revised version of the manuscript  
415 prior to acceptance.

416

## 417 **References**

418

- 419 Aizen, M. A. et al. 2012. Specialization and rarity predict nonrandom loss of interactions  
420 from mutualist networks. - *Science* (80-. ). 335: 1486–1489.
- 421 Alaux, C. et al. 2010. Diet effects on honeybee immunocompetence. - *Biol. Lett.* 6: 562–565.
- 422 Albrecht, M. et al. 2012. Diverse pollinator communities enhance plant reproductive success.  
423 - *Proc. R. Soc. B Biol. Sci.* 279: 4845–4852.
- 424 Bartomeus, I. et al. 2016. A common framework for identifying linkage rules across different  
425 types of interactions. - *Funct. Ecol.* 30: 1894–1903.
- 426 Bartoń, K. 2018. MuMIn: Multi-Model Inference.: version 1.40.4.
- 427 Bates, D. et al. 2015. Fitting Linear Mixed-Effects Models using lme4. - *J. Stat. Softw.* 67: 1–  
428 48.
- 429 Batstone, R. T. et al. 2018. Using niche breadth theory to explain generalization in  
430 mutualisms. - *Ecology* 99: 1039–1050.
- 431 Bawa, K. S. 1990. Plant-Pollinator Interactions in Tropical Rain Forests. - *Annu. Rev. Ecol.*  
432 *Syst.* 21: 399–422.
- 433 Behmer, S. T. 2009. Insect Herbivore Nutrient Regulation. - *Annu. Rev. Entomol.* 54: 165–  
434 187.
- 435 Bergamo, P. J. et al. 2017. The potential indirect effects among plants via shared  
436 hummingbird pollinators are structured by phenotypic similarity. - *Ecology* 98: 1849–  
437 1858.

- 438 Biesmeijer, J. C. et al. 2006. Parallel declines in pollinators and insect-pollinated plants in  
439 Britain and the Netherlands. - *Science* (80-. ). 313: 351–354.
- 440 Bleiweiss, R. 1998. Origin of hummingbird faunas. - *Biol. J. Linn. Soc.* 65: 77–97.
- 441 Blüthgen, N. 2010. Why network analysis is often disconnected from community ecology: A  
442 critique and an ecologist’s guide. - *Basic Appl. Ecol.* 11: 185–195.
- 443 Blüthgen, N. et al. 2006. Measuring specialization in species interaction networks. - *BMC*  
444 *Ecol.* 6: 9.
- 445 CaraDonna, P. J. et al. 2017. Interaction rewiring and the rapid turnover of plant–pollinator  
446 networks. - *Ecol. Lett.* 20: 385–394.
- 447 Dalsgaard, B. et al. 2008. Pollination networks and functional specialization: A test using  
448 Lesser Antillean plant-hummingbird assemblages. - *Oikos* 117: 789–793.
- 449 Dalsgaard, B. et al. 2011. Specialization in plant-hummingbird networks is associated with  
450 species richness, contemporary precipitation and quaternary climate-change velocity. -  
451 *PLoS One* 6: e25891.
- 452 Dalsgaard, B. et al. 2017. Opposed latitudinal patterns of network-derived and dietary  
453 specialization in avian plant–frugivore interaction systems. - *Ecography (Cop.)*. 40:  
454 1395–1401.
- 455 Dalsgaard, B. et al. 2018. Trait evolution, resource specialization and vulnerability to plant  
456 extinctions among antillean hummingbirds. - *Proc. R. Soc. B Biol. Sci.* 285: 20172754.
- 457 Di Pasquale, G. et al. 2013. Influence of pollen nutrition on honey bee health: do pollen  
458 quality and diversity matter? - *PLoS One* 8: e72016.
- 459 Dorado, J. et al. 2011. Rareness and specialization in plant-pollinator networks. - *Ecology* 92:  
460 19–25.
- 461 Dormann, C. F. et al. 2009. Indices, Graphs and Null Models: Analyzing Bipartite Ecological  
462 Networks. - *Open Ecol. J.* 2: 7–24.
- 463 Dormann, C. F. et al. 2017. Identifying Causes of Patterns in Ecological Networks:  
464 Opportunities and Limitations. - *Annu. Rev. Ecol. Evol. Syst.* 48: 559–584.
- 465 Dupont, Y. L. et al. 2003. Structure of a plant–flower-visitor network in the high-altitude  
466 sub-alpine desert of Tenerife, Canary Islands. - *Ecography (Cop.)*. 26: 301–310.
- 467 Emer, C. et al. 2016. Species roles in plant–pollinator communities are conserved across  
468 native and alien ranges. - *Divers. Distrib.* 22: 841–852.
- 469 Fontaine, C. et al. 2008. Generalist foraging of pollinators: Diet expansion at high density. -  
470 *J. Ecol.* 96: 1002–1010.
- 471 Fort, H. et al. 2016. Abundance and generalisation in mutualistic networks: Solving the  
472 chicken-and-egg dilemma. - *Ecol. Lett.* 19: 4–11.
- 473 Fox, J. and Weisberg, S. 2002. *An R Companion to Applied Regression*. - Sage.
- 474 Fründ, J. et al. 2016. Sampling bias is a challenge for quantifying specialization and network  
475 structure: Lessons from a quantitative niche model. - *Oikos* 125: 502–513.
- 476 Heithaus, E. R. 1974. The Role of Plant-Pollinator Interactions in Determining Community  
477 Structure. - *Ann. Missouri Bot. Gard.* 61: 675–691.
- 478 Jordano, P. 2016. Sampling networks of ecological interactions. - *Funct. Ecol.* 30: 1883–  
479 1893.
- 480 Junker, R. R. et al. 2013. Specialization on traits as basis for the niche-breadth of flower  
481 visitors and as structuring mechanism of ecological networks. - *Funct. Ecol.* 27: 329–  
482 341.
- 483 Kaiser-Bunbury, C. N. et al. 2017. Ecosystem restoration strengthens pollination network  
484 resilience and function. - *Nature* 542: 223–227.
- 485 Martín González, A. M. et al. 2015. The macroecology of phylogenetically structured  
486 hummingbird-plant networks. - *Glob. Ecol. Biogeogr.* 24: 1212–1224.
- 487 Maruyama, P. K. et al. 2014. Morphological and spatio-temporal mismatches shape a

- 488 neotropical savanna plant-hummingbird network. - *Biotropica* 46: 740–747.
- 489 Nakagawa, S. and Schielzeth, H. 2013. A general and simple method for obtaining R<sup>2</sup> from  
490 generalized linear mixed-effects models. - *Methods Ecol. Evol.* 4: 133–142.
- 491 Olesen, J. M. et al. 2008. Temporal dynamics in a pollination network. - *Ecology* 89: 1573–  
492 1582.
- 493 Ollerton, J. 2017. Pollinator Diversity: Distribution, Ecological Function, and Conservation. -  
494 *Annu. Rev. Ecol. Evol. Syst.* 48: 353–376.
- 495 Ollerton, J. et al. 2007. Multiple meanings and modes: On the many ways to be a generalist  
496 flower. - *Taxon* 56: 717–728.
- 497 Poisot, T. et al. 2015. Beyond species: Why ecological interaction networks vary through  
498 space and time. - *Oikos* 124: 243–251.
- 499 Ratto, F. et al. 2018. Global importance of vertebrate pollinators for plant reproductive  
500 success: a meta-analysis. - *Front. Ecol. Environ.* 16: 82–90.
- 501 Rech, A. R. et al. 2016. The macroecology of animal versus wind pollination: ecological  
502 factors are more important than historical climate stability. - *Plant Ecol. Divers.* 9: 253–  
503 262.
- 504 Tasei, J.-N. and Aupinel, P. 2008. Nutritive value of 15 single pollens and pollen mixes  
505 tested on larvae produced by bumblebee workers (*Bombus terrestris*, Hymenoptera:  
506 Apidae). - *Apidologie* 39: 397–409.
- 507 Tinoco, B. A. et al. 2017. Effects of hummingbird morphology on specialization in  
508 pollination networks vary with resource availability. - *Oikos* 126: 52–60.
- 509 Vaudo, A. D. et al. 2015. Bee nutrition and floral resource restoration. - *Curr. Opin. Insect*  
510 *Sci.* 10: 133–141.
- 511 Vázquez, D. P. and Aizen, M. A. 2003. Null model analyses of specialization in plant-  
512 pollinator interactions. - *Ecology* 84: 2493–2501.
- 513 Vázquez, D. P. et al. 2007. Species abundance and asymmetric interaction strength in  
514 ecological networks. - *Oikos* 116: 1120–1127.
- 515 Vázquez, D. P. et al. 2009. Uniting pattern and process in plant-animal mutualistic networks:  
516 A review. - *Ann. Bot.* 103: 1445–1457.
- 517 Vizentin-Bugoni, J. et al. 2014. Processes entangling interactions in communities: forbidden  
518 links are more important than abundance in a hummingbird-plant network. - *Proc. R.*  
519 *Soc. B Biol. Sci.* 281: 20132397.
- 520 Vizentin-Bugoni, J. et al. 2016. Influences of sampling effort on detected patterns and  
521 structuring processes of a Neotropical plant-hummingbird network. - *J. Anim. Ecol.* 85:  
522 262–272.
- 523 Vizentin-Bugoni, J. et al. 2018. Plant-Pollinator Networks in the Tropics: A Review. - In:  
524 Dáttilo, W. and Rico-Gray, V. (eds), *Ecological Networks in the Tropics: An Integrative*  
525 *Overview of Species Interactions from Some of the Most Species-Rich Habitats on*  
526 *Earth*. Springer International Publishing, pp. 73–91.
- 527 Waser, N. M. et al. 1996. Generalization in pollination systems, and why it matters. -  
528 *Ecology* 77: 1043–1060.
- 529 Weinstein, B. G. and Graham, C. H. 2017. Persistent bill and corolla matching despite  
530 shifting temporal resources in tropical hummingbird-plant interactions. - *Ecol. Lett.* 20:  
531 326–335.
- 532
- 533

534 **Tables**

535

536 **Table 1:** Truth table listing all possible outcomes for the propositions “if it is a dodo, it is  
537 extinct” and “if it is abundant, it is generalist”. ‘T’ is ‘True’ and ‘F’ is ‘False’.

| Outcome | Dodo/Abundant | Extinct/Generalist |
|---------|---------------|--------------------|
| A       | T             | T                  |
| B       | F             | F                  |
| C       | F             | T                  |
| D       | T             | F                  |

538

539

540 **Figures**

541

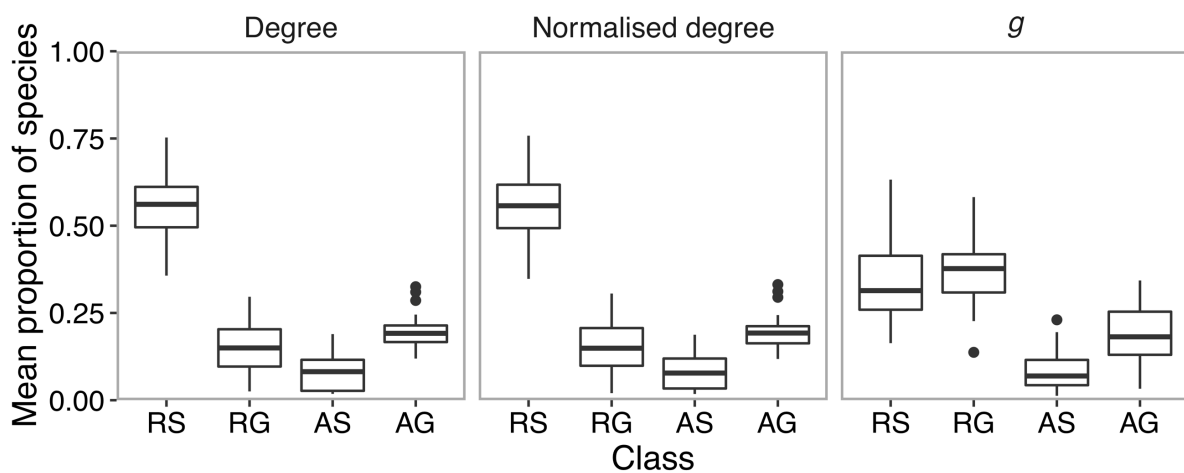

542

543 **Figure 1:** The mean proportion of hummingbird species classified as rare specialists (‘RS’),  
544 rare generalists (‘RG’), abundant specialists (‘AS’) and abundant generalists (‘AG’) across all  
545 networks, for three generalisation metrics: degree, normalised degree and  $g$ . The bold centre  
546 line in each box is the median; the lower and upper hinges are the first and third quartiles,  
547 respectively. The lower whisker indicates the smallest value no less than 1.5 times the inter-  
548 quartile range; the upper whisker indicates the largest value no greater than 1.5 times the inter-  
549 quartile range. Data outside the whiskers are outlying points plotted as solid black circles.



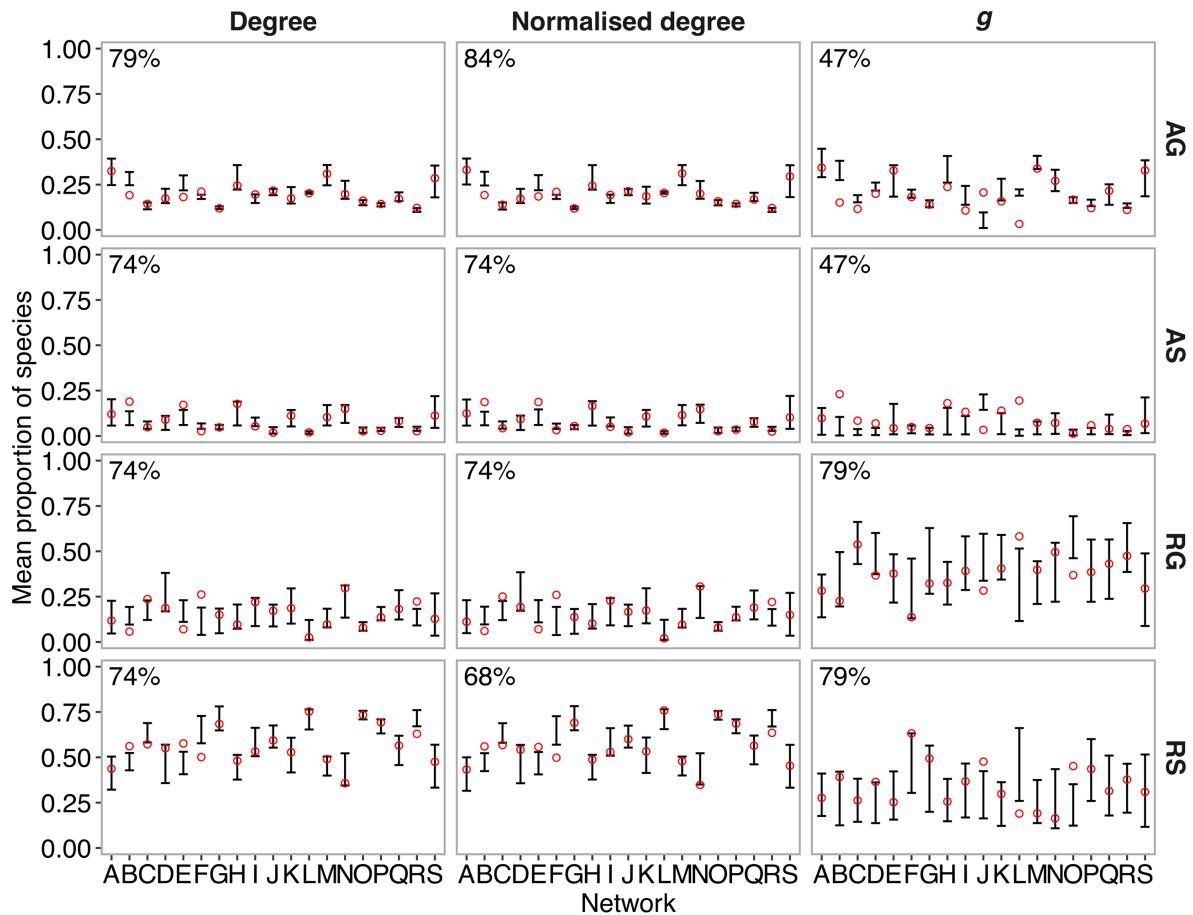

550  
551 **Figure 2:** Comparisons between empirical networks (A-S) and null model networks in the  
552 proportions of species in each of the abundance-generalisation categories ‘RS’ (rare  
553 specialists), ‘RG’ (rare generalists), ‘AS’ (abundant specialists) and ‘AG’ (abundant  
554 generalists). Error bars represent the 95% confidence intervals of the mean proportion of  
555 hummingbird species in each abundance-generalisation category as predicted by 1000 null  
556 networks. Red circles show the empirically observed mean proportion of hummingbird species  
557 in each category. If the red circle is within the error bars, there were no significant differences  
558 between the observed proportions and the neutrality null model proportions. Percentages in the  
559 top left of each panel give the proportion of networks where empirical proportions were not  
560 significantly different from the null model proportions. Results are shown for each network  
561 (A-S) and for each generalisation metric (Degree, Normalised degree, g).  
562
